# Supplementary material for: Growth of bimodal NiCo2O4·MnO2 nanorods in situ on carbon fiber paper synergistically affects their electrochemical properties
Source: Royal Society of Chemistry journal article supplement (doi:10.1039/d0nj06200f), 2021-01-01
Supplement: d0nj06200f1.pdf [file d0nj06200f1.pdf]

## Supplementary Information

### **Growth of bimodal NiCo<sub>2</sub>O<sub>4</sub>.MnO<sub>2</sub> nanorods in-situ on carbon fiber paper synergistically affect the electrochemical properties**

*Viresh Kumar and Himanshu Sekhar Panda\**

*Sustainable Energy Laboratory, Department of Metallurgical and Materials Engineering, Defence Institute of Advanced Technology, Pune-25, India*

\*Corresponding Author Address:

Dr. Himanshu Sekhar Panda

Tel. No.: +91-20-24304205,

Email: himanshusp@diat.ac.in, hspanda3@gmail.com

Department of Metallurgical and Materials Engineering, Defence Institute of Advanced Technology, Pune 411025, India

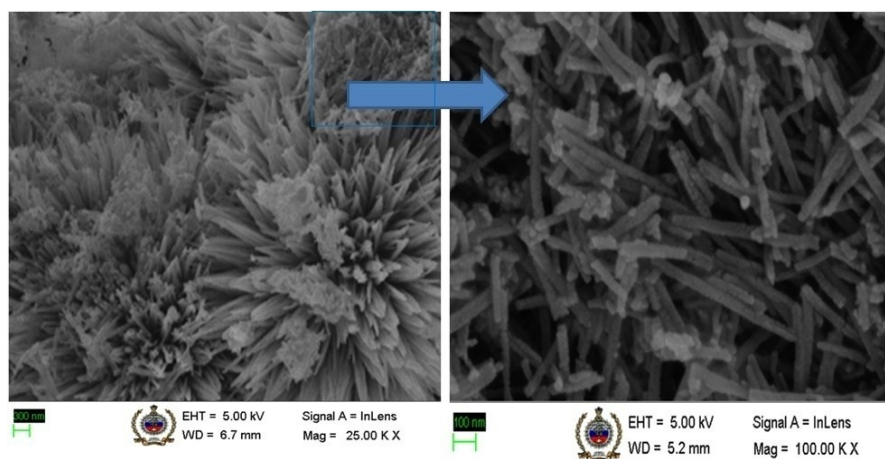

Figure S1. SEM images of NCM 1:2:2 at different magnification

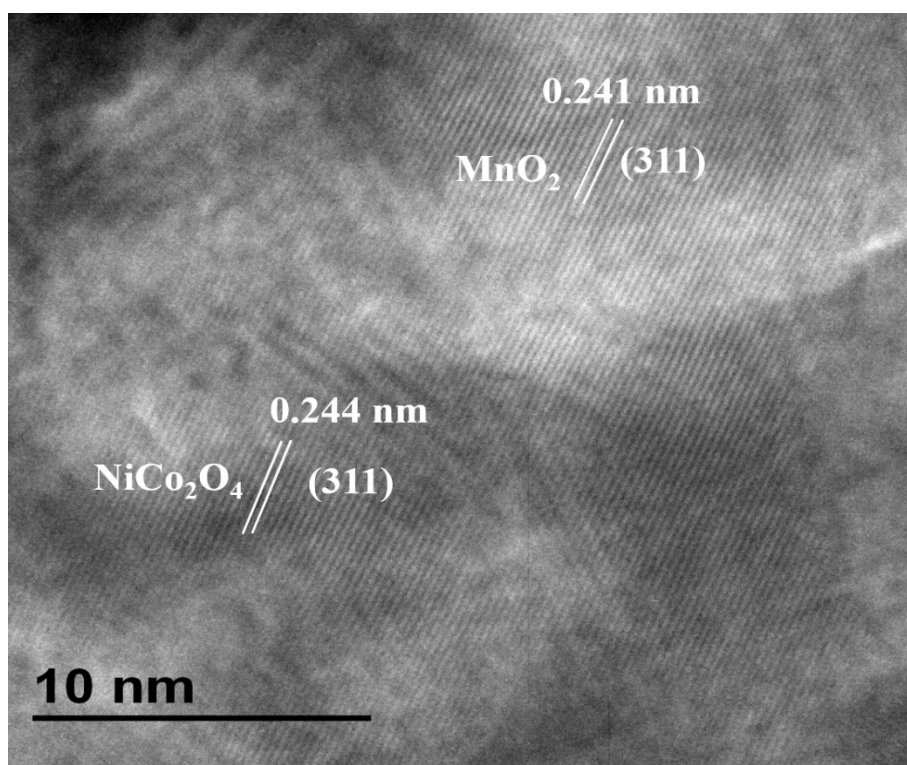

Figure S2. HRTEM image of NCM 1:2:2

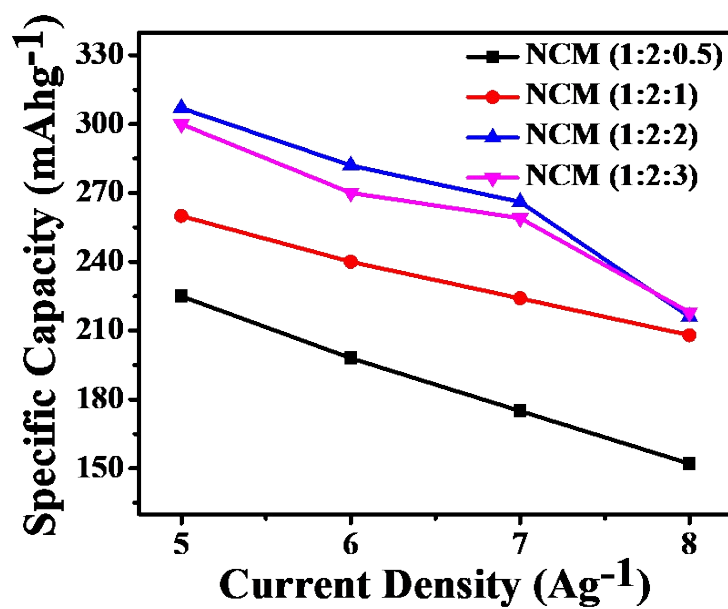

Figure S3: Specific capacity of prepared NCM nanorods at various current densities

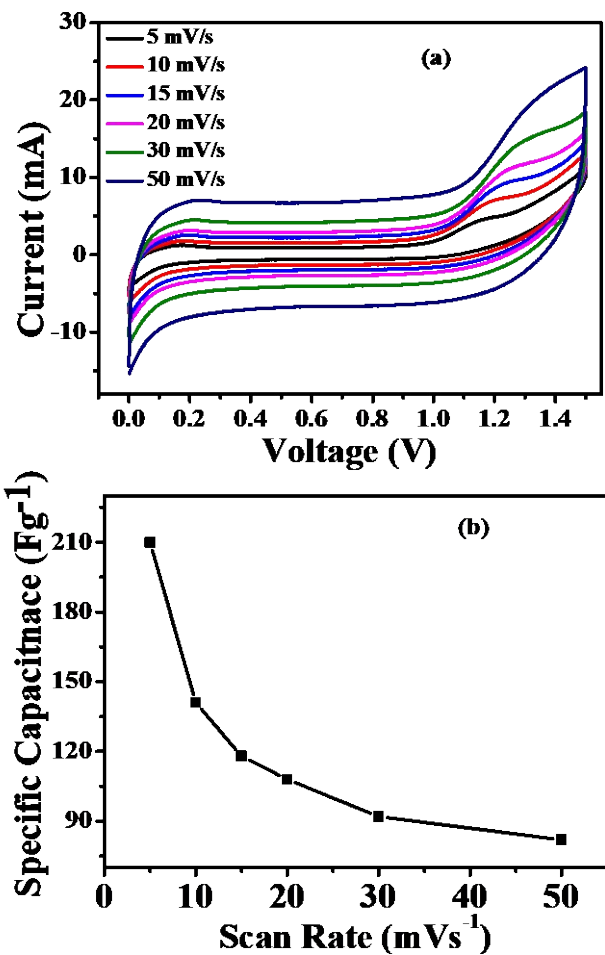

Figure S4. CV curves of the fabricated device of (a) NCM 1:2:2 and (b) Specific capacitance versus various scan rate
